# Supplementary material for: Bacterial Microbiota of Field-Collected Helicoverpa zea (Lepidoptera: Noctuidae) from Transgenic Bt and Non-Bt Cotton
Source: MDPI journal article supplement (doi:10.3390/microorganisms9040878), 2021-04-20
Supplement: s1 [file s1]

# Bacterial Microbiota of Field-Collected *Helicoverpa zea* (Lepidoptera: Noctuidae) from Transgenic Bt and Non-Bt Cotton

Jean M. Deguenon <sup>1</sup>, Anirudh Dhammi <sup>1</sup>, Loganathan Ponnusamy <sup>1,\*</sup>, Nicholas V. Travanty <sup>1</sup>, Grayson Cave <sup>1</sup>, Roger Lawrie <sup>1</sup>, Dan Mott <sup>1</sup>, Dominic Reisig <sup>1</sup>, Ryan Kurtz <sup>2</sup> and R. Michael Roe <sup>1</sup>

<sup>1</sup> Department of Entomology and Plant Pathology, 3230 Ligon Street, Campus Box 7647, North Carolina State University, Raleigh, NC 27695-7647, USA; jdeguen@ncsu.edu (J.M.D.); adhammi@ncsu.edu (A.D.); nvtravan@ncsu.edu (N.V.T.); glcave@ncsu.edu (G.C.); rdlawrie@ncsu.edu (R.L.); dmott@ncsu.edu (D.M.); ddreisig@ncsu.edu (D.R.); michael\_roe@ncsu.edu (R.M.R.)

<sup>2</sup> Cotton Incorporated, Cary, NC 27513, USA; rkurtz@cottoninc.com

\* Correspondence: lponnus@ncsu.edu

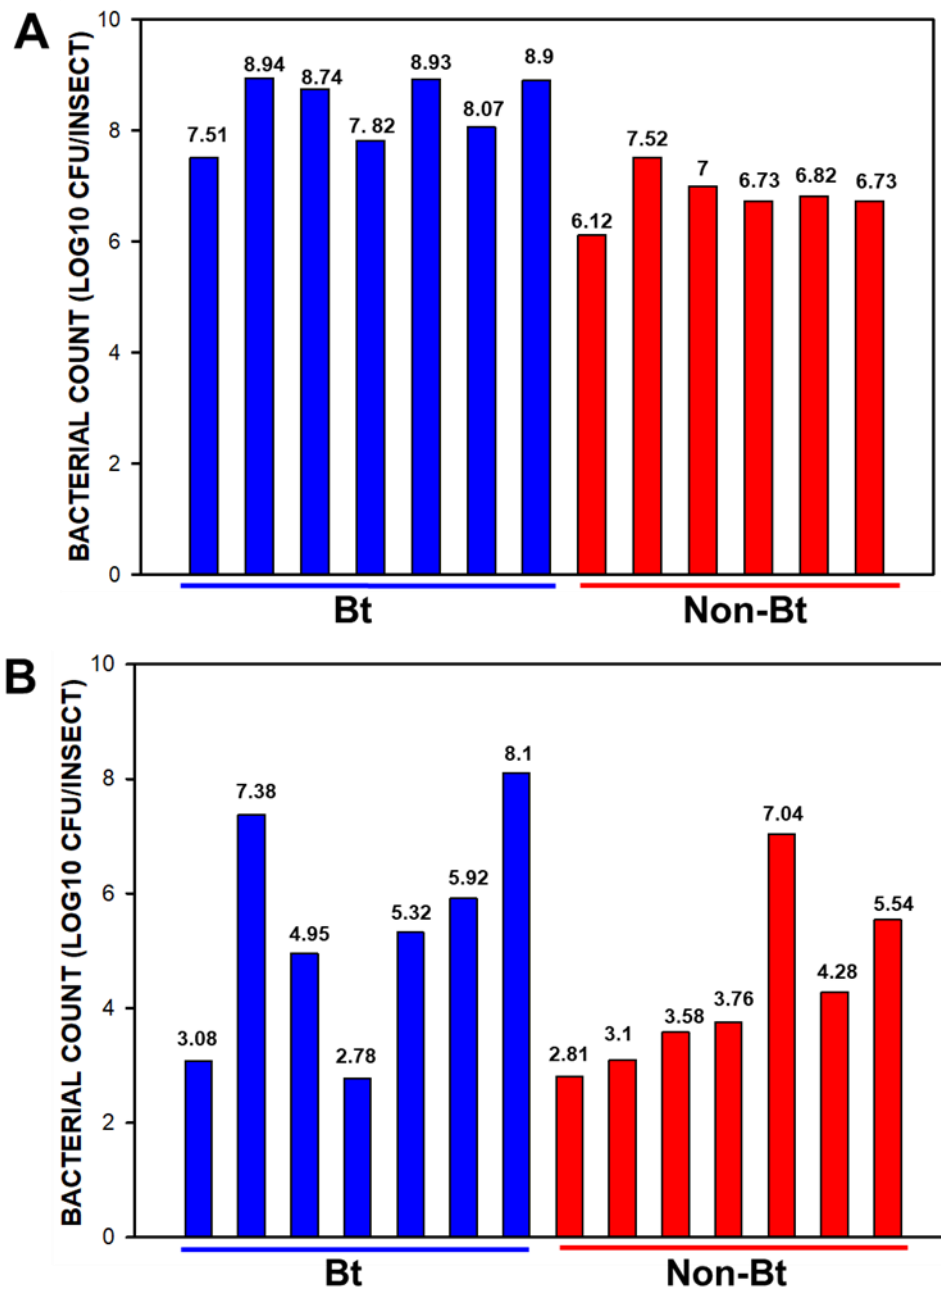

**Figure S1.** Detailed prevalence (per sample) of cultivable bacterial loads in bollworms from non-Bt cotton versus Bt (Wid-eStrike) cotton from the field. (A) 2<sup>nd</sup> to 3<sup>rd</sup> stadium *Helicoverpa zea* larvae collected in August 2016; (B) 3<sup>rd</sup> stadium bollworms collected in August 2018. Each bar represents the median number (log-converted) of Colony Forming Units.

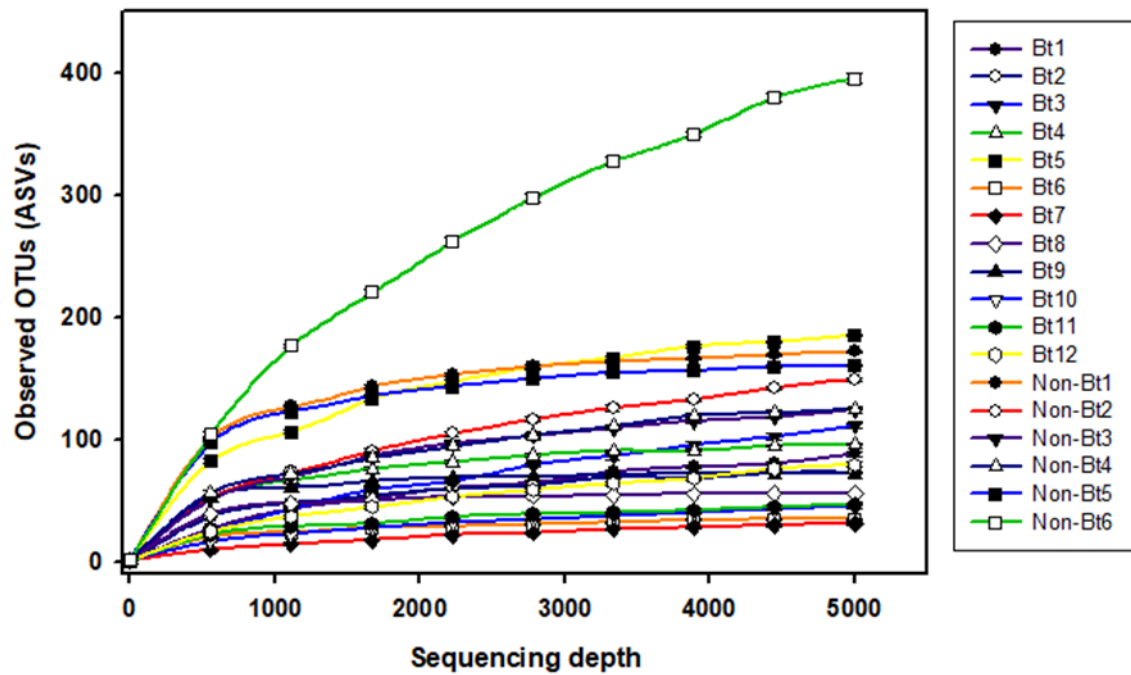

**Figure S2.** Rarefaction curves of the number of observed OTUs (sequence variants) from internal DNA samples of the cotton bollworm, *Helicoverpa zea*. Bt: sample originating from third stadium larvae from Bt (WideStrike, Cry1Ac + Cry1F) cotton. Non-Bt: sample originating from third stadium larvae from non-Bt cotton. Number after sample origin represents sample number. Sequences were obtained from amplified DNA fragments overlapping the V3–V4 hypervariable regions of the 16S rRNA gene.
